# Supplementary material
Source: MDPI journal article supplement (https://www.mdpi.com/2073-445X/11/7/1070)
Supplement: s1 [file s1 › land-1752490-supplementary.pdf]

## Supplementary Materials

Global Land Cover Maps (2003 & 2015) were downloaded from the European space Agency Land cover products and masked to the extent of Ghana. By default, the ESA land cover map has 23 land cover classes. The maps were simplified by merging similar land cover classes. The final land cover maps used in further analysis have 7 land cover classes. The table below shows the actual and revised land cover classes.

**Table S1.** Historical land cover maps of the study area.

| ESA ID | ESA Land Cover Class                                                 | Revised Class    |
|--------|----------------------------------------------------------------------|------------------|
| 10     | Cropland (Rainfed)                                                   | Arable Land      |
| 20     | Cropland (Irrigated)                                                 |                  |
| 30     | Mosaic cropland                                                      |                  |
| 11     | Herbaceous cover                                                     | Shrub/Herb Cover |
| 100    | Mosaic tree and shrub (>50%) / herbaceous cover (<50%)               |                  |
| 110    | Mosaic herbaceous cover (>50%) / tree and shrub (<50%)               |                  |
| 120    | Shrubland                                                            |                  |
| 122    | Shrubland deciduous                                                  |                  |
| 153    | Sparse Herbaceous Cover (<15%)                                       |                  |
| 180    | Shrub/Herb Cover (Flooded)                                           | Forest           |
| 40     | Mosaic natural vegetation (tree/herb. cover) (>50%) /cropland (<50%) |                  |
| 50     | Tree Cover (Broadleaved)herbaceous cover) (>50%) / cropland (<50%)   |                  |
| 60     | Tree Cover (Broadleaved)(herbaceous cover) (>50%) / cropland (<50%)  |                  |
| 62     | Tree Cover (Broadleaved)(herbaceous cover) (>50%) / cropland (<50%)  |                  |
| 150    | Sparse Tree Vegetation                                               |                  |
| 160    | Tree Cover (flooded)                                                 | Grassland        |
| 170    | Tree Cover (flooded)                                                 |                  |
| 130    | Grassland                                                            |                  |
| 190    | Urban Areas                                                          | Urban Areas      |
| 200    | Bare Areas                                                           | Bare Areas       |
| 201    | Bare Areas (Consolidated)                                            |                  |
| 202    | Bare Areas (Unconsolidated)                                          |                  |
| 210    | Water Bodies                                                         | Water Bodies     |
